1 **Epidemiological Study and Analysis of Factors Related to Skin Lesions Caused by Medical**  
2 **Disinfectants, and Personal Protective Equipment among Epidemic-Prevention Workers**  
3 **During the Severe Acute Respiratory Syndrome Coronavirus 2 Pandemic Lockdown Period**

4 Jing-Yi Hu <sup>a</sup>, Xiu-Li Xiao <sup>b</sup>, Yi Lu <sup>b</sup>, Jian-Yong Su <sup>c</sup>, Yan Zhang <sup>b</sup>, Ting Shang <sup>b</sup>, Chun-Hua  
5 Zhang <sup>b</sup>, Lian Guo <sup>b</sup>, Jian-Chao Wang <sup>b</sup>

6 <sup>a</sup> Chinese Medicine Department, Gaojing Town Community Health Service Center, 200439,  
7 Shanghai, China; <sup>b</sup> Department of Dermatology, Shanghai Baoshan District Hospital of Integrated  
8 Traditional and Western Medicine, Shanghai University of Traditional Chinese Medicine, 200199,  
9 Shanghai, China; <sup>c</sup> Department of Medical Cosmetology, Shanghai Baoshan District Hospital of  
10 Integrated Traditional and Western Medicine, Shanghai University of Traditional Chinese  
11 Medicine, 200199, Shanghai, China

12 **CONTACT** 1.Xiu-Li Xiao, [xxl\\_me@163.com](mailto:xxl_me@163.com), Chief, Department of Dermatology, Shanghai  
13 Baoshan District Hospital of Integrated Traditional and Western Medicine, Shanghai University of  
14 Traditional Chinese Medicine, Shanghai, 201999, China; 2. Jing-Yi Hu, [13818879096@139.com](mailto:13818879096@139.com),  
15 Chinese Medicine Department, Gaojing Town Community Health Service Center, Shanghai,  
16 200439,China \*These authors are co-first authors and contributed equally to this work.

17 **Correspondent:** 1.Xiu-Li Xiao, [xxl\\_me@163.com](mailto:xxl_me@163.com), Chief, Department of Dermatology,  
18 Shanghai Baoshan District Hospital of Integrated Traditional and Western Medicine,  
19 Shanghai University of Traditional Chinese Medicine, Shanghai, 201999, China; 2. Jing-Yi  
20 Hu, [13818879096@139.com](mailto:13818879096@139.com), Chinese Medicine Department, Gaojing Town Community  
21 Health Service Center, Shanghai, 200439,China

22 \*These authors are co-first authors and contributed equally to this work.

23 **Abstract: Objective:** The aim of this study was to investigate the prevalence of and potential risk  
24 factors associated with skin lesions resulting from the use of medical disinfectants and personal  
25 protective equipment (PPE) among epidemic prevention workers (including healthcare  
26 professionals, temporary sampling site workers, community members and volunteers) during the  
27 Severe Acute Respiratory Syndrome Coronavirus 2 (SARS-CoV-2) pandemic lockdown period in  
28 China. **Methods:** We conducted a survey to investigate the prevalence and factors associated with  
29 skin lesions during SARS-CoV-2 pandemic lockdown period among epidemic prevention workers  
30 in Gaojing town of Baoshan distract, Shanghai, China. **Results:** A total of 1033 questionnaires  
31 were reviewed, with 995 deemed valid. Among the 995 respondents, 209 (21.01%) reported  
32 comorbidities, while 786 (78.99%) were considered as controls. Autoimmune diseases, family  
33 history of dermatitis, cardiovascular diseases (CVDs), palmar and plantar hyperhidrosis, allergic  
34 diseases and the total time spent on skin cleansing and antisepsis procedures were identified as  
35 independent risk factors for these skin lesions. **Conclusion:** During the SARS-CoV-2 pandemic  
36 lockdown period, skin lesions among epidemic prevention workers was prevalent, which was  
37 primarily attributed to the use of medical disinfectants and PPE. These skin lesions frequently  
38 manifested as a combination of various subtypes across different areas of the body. Several  
39 individual factors, along with the total time spent on skin cleansing and skin antisepsis procedures,  
40 were identified as significant risk factors for the development of these skin lesions.

41 **Keywords:** Prevalence; Risk factors; Skin lesions; Medical disinfectants; Personal protective  
42 equipment; SARS-CoV-2 Pandemic

43 **1. Introduction**

44 During the SARS-CoV-2 pandemic, the occurrence of skin lesions resulting from medical  
NOTE: This preprint reports new research that has not been certified by peer review and should not be used to guide clinical practice.

45 disinfectants and personal protective equipment (PPE), such as device-related pressure injuries  
46 (DRPIs), moisture-associated skin damage (MASD) and skin tears (STs), significantly  
47 affected the physical and mental well-being of individuals involved in epidemic-prevention  
48 efforts. Early domestic studies published in 2020 revealed that the incidence of these skin lesions  
49 ranged from 28.44% to 93.39% [3-4]. DRPIs incidence ranged from 26.58% to 57.51% [1-5]. In  
50 the literature prior to 2019, the incidence of STs ranged from 1.06% to 22.00% [8-9], while the  
51 incidence of MASD was 8.83% [5]. Additionally, the rates of dermal impregnation and allergic  
52 contact dermatitis have increased to 62.42% and 58.91% [2], respectively.

53 Previous studies have exclusively focused on medical personnel between the ages of twenty and  
54 forty years in SARS-CoV-2-designated hospitals in China [2-5]. However, during the SARS-CoV-2  
55 pandemic lockdown period (January 1st, 2022 to March 31st, 2023), a substantial number of  
56 SARS-CoV-2 nucleic acid detection samples were collected during the outbreak of SARS-CoV-2  
57 infections. Healthcare professionals, temporary sampling site workers, community members and  
58 volunteers made significant effort to combat the SARS-CoV-2 outbreak. During the period  
59 spanning from December 2019 to January 2022, there was a noticeable shift in public health  
60 priorities, with a greater emphasis on quarantine measures and prevention strategies rather than  
61 solely treating and controlling the epidemic. The increased demand for community-based  
62 prevention support has led to the active involvement of various community resources (including  
63 nonhealth-care workers) in epidemic prevention efforts within urban communities in China.  
64 However, further investigation is required to determine whether the prevalence and characteristics  
65 of skin lesions has changed over time. Furthermore, the literature has focused primarily on factors  
66 such as occupation, workforce, age, sex and protection level [3-4], while personal factors such as  
67 autoimmune or allergic diseases in relation to disease onset remain unexplored. Therefore, the  
68 findings of this research will contribute to the clinical understanding of this issue.

## 69 **2. Materials and methods**

### 70 **2.1. Research subjects**

71 Between 1st April 2023 and 1st August 2023, a cross-sectional online survey was conducted in  
72 Gaojing town, Baoshan district, Shanghai. The recruitment of potential participants was facilitated  
73 through a network sampling approach, where the Ministry of Public Health and local government  
74 agencies were contacted to distribute a link to the online survey to all community neighborhood  
75 committees in Gaojing town and the health facilities situated in and around the aforementioned  
76 area. Healthcare professionals, temporary sampling site workers, community members and  
77 volunteers who were engaged Level 1-3 barrier protection measures to prevent the transmission of  
78 SARS-CoV-2 were recruited on a voluntary basis. No limitations based on age, sex or nationality  
79 were imposed. The exclusion criteria included incomplete or inaccurate questionnaire responses,  
80 as well as data that could not be effectively analyzed or appropriately characterized.

### 81 **2.2. Study design, data collection, and sample size**

82 This study adopted a retrospective cross-sectional design. A survey was conducted using a  
83 self-administered questionnaire and the reliability and validity of the presurvey data, which  
84 exceeded 0.9, were analyzed. Data collection was facilitated through the “Sojump” website and  
85 background system. Following data collection, incomplete or duplicate questionnaires were  
86 removed by information technicians, and a database was established.

87 The sample size calculation was based on the calculation for estimating prevalences in  
88 cross-sectional studies ( $n=Z_{\sigma}^2 \times pq/d^2$ ). The incidence of the surveyed population was estimated

89 with 95% confidence using  $Z\sigma$ , which was determined to be 1.96. Previous literature indicated an  
90 approximate incidence of 50% for the skin lesions evaluated, resulting in  $p=50\%$  and  $q=1-p=50\%$ .  
91 The allowable error,  $d$ , was estimated to be 0.1 times  $p$ , or 5%. Consequently, the sample size,  $n$ ,  
92 was determined to be 387 for each group (the case group and the control group), resulting in a  
93 total sample size of 774. Accounting for an expected invalid response rate of 10%, the total  
94 sample size was adjusted to 847.

95 A total of 1033 questionnaires were recovered and collected, 31 incomplete questionnaires were  
96 excluded, and 7 duplicate questionnaires were obtained, resulting in 995 valid questionnaires,  
97 yielding a 96.3% completion rate.

### 98 2.3. Measurements

99 Statistical analyses were conducted using SPSS software (version 25.0). Normally distributed data  
100 are presented as  $\bar{x} \pm s$ . Comparisons between two groups were performed using independent  
101 sample t- tests. The frequency was used to describe the count data.

102 The  $\chi^2$  test was employed to analyze the difference in prevalence between the two groups. A  
103 logistic regression analysis model was used to examine potential risk factors for the occurrence of  
104 these skin lesions, utilizing a significance level of  $\alpha=0.05$ . Nonnormally distributed data are  
105 presented as the median (M), and 25th and 75th percentiles (P25 and P75, respectively). The  
106 Mann-Whitney U test was utilized to compare the two groups. Results for which  $P < 0.05$  were  
107 determined to be statistically significant.

## 108 3. Results

### 109 3.1.1. Baseline data distribution of the survey population

110 The baseline data of the 995 subjects, including sex, age, occupation, workforce and protection  
111 level, are shown in Table 1. Of the participants, 23.51% were male. All participants were aged  
112 18-80 years, and the mean age of all participants was  $42.98 \pm 12.46$  years.

113 The distributions of sex, age and proportions related to occupation, workforce and protection level  
114 were tested using the chi-square test. There were no significant differences in sex, ages, or  
115 protection level between the two groups, however, we noted significant differences in the  
116 proportions of occupations ( $\chi^2=17.899$ ,  $P=0.003$ ) and workers ( $\chi^2=15.935$ ,  $P=0.001$ ) between the  
117 two groups.

118 Table 1. Baseline data distribution of the survey population (n=995)

| Variables                                        | Control Group<br>(n, %) | Case Group (n, %) | $\chi^2$ value | P value |
|--------------------------------------------------|-------------------------|-------------------|----------------|---------|
| <b>Total</b>                                     | 786 (78.99)             | 209 (21.01)       | -              | -       |
| <b>Sex</b>                                       |                         |                   |                |         |
| Male                                             | 188 (18.89)             | 46 (4.62)         | 0.335          | 0.563   |
| Female                                           | 598 (60.11)             | 163 (16.38)       |                |         |
| <b>Age, mean <math>\pm</math> SD<br/>(years)</b> | 43.55 $\pm$ 12.46       | 40.84 $\pm$ 12.22 | -              | -       |
| $\leq 30$                                        | 105 (10.55)             | 35 (3.52)         | 5.973          | 0.113   |
| 31~45                                            | 402 (40.40)             | 118 (11.86)       |                |         |
| 46~65                                            | 212 (21.31)             | 42 (4.22)         |                |         |
| $\geq 66$                                        | 67 (6.73)               | 14 (1.41)         |                |         |

**Occupation**

|               |             |           |        |        |
|---------------|-------------|-----------|--------|--------|
| Doctor        | 195 (19.60) | 73 (7.34) |        |        |
| Nurse         | 198 (19.89) | 63 (6.33) |        |        |
| Pharmacist    | 32 (3.22)   | 10 (1.01) |        |        |
| Administrator | 73 (7.34)   | 12 (1.21) | 17.899 | 0.003* |
| Volunteer     | 200 (20.10) | 33 (3.31) |        |        |

|                                                          |           |           |  |  |
|----------------------------------------------------------|-----------|-----------|--|--|
| Community Member<br>or Temporary Sampling<br>Site Worker | 88 (8.84) | 18 (1.81) |  |  |
|----------------------------------------------------------|-----------|-----------|--|--|

**Workforce**

|                               |             |           |        |        |
|-------------------------------|-------------|-----------|--------|--------|
| Community Health<br>Center    | 191 (19.20) | 51 (5.13) |        |        |
| Secondary General<br>Hospital | 169 (16.98) | 52 (5.23) | 15.935 | 0.001* |
| Tertiary General<br>Hospital  | 138 (13.87) | 56 (5.63) |        |        |
| Temporary Sampling<br>Site    | 288 (28.94) | 50 (5.02) |        |        |

**Protection level<sup>14</sup> \***

|         |             |             |       |       |
|---------|-------------|-------------|-------|-------|
| Level 3 | 531 (53.37) | 128 (12.86) |       |       |
| Level 2 | 185 (18.59) | 53 (5.33)   | 4.604 | 0.100 |
| Level 1 | 70 (7.04)   | 28 (2.81)   |       |       |

119 Note: n, number of patients; %, proportion. \*: **Level 1 protection:** Medical staff wear disposable work  
 120 clothes, hats, isolation suits, gloves, and surgical masks. **Level 2 protection:** Medical staff wore  
 121 medical masks, goggles or face shields, protective clothing, gloves, and shoe covers. **Level 3 protection:**  
 122 Medical staff wore full face respirators or higher-level air supply in addition to the Level 2  
 123 requirements.

124 **3.1.2. Personal factors and other potential risk factors**

125 Differences in personal factors and other potential risk factors, such as variations in the amount of  
 126 exposure to disinfectants, the total time spent on skin cleansing and skin antiseptis procedures, the  
 127 total time spent on wearing PPE and the protection level, were tested using the chi-square test  
 128 (Table 2).

129 Table 2. Distribution of related personal factors among participants (n=995)

| Variables                                                                                                           | Control group (n,<br>%) | Case group (n,<br>%) | $\chi^2$ value | P value |
|---------------------------------------------------------------------------------------------------------------------|-------------------------|----------------------|----------------|---------|
| <b>Exposure to disinfectants *</b>                                                                                  |                         |                      |                |         |
| Ethanol-based disinfectant                                                                                          | 624 (62.71)             | 165 (16.58)          |                |         |
| Hydrogen peroxide disinfectant                                                                                      | 341 (34.27)             | 117 (11.76)          | 4.516          | 0.211   |
| Chlorine-containing disinfectant                                                                                    | 202 (20.30)             | 69 (6.93)            |                |         |
| Peracetic acid disinfectant                                                                                         | 36 (3.62)               | 11 (1.11)            |                |         |
| <b>Total time spent on skin cleansing<br/>and antiseptis procedures (hours/<br/>week), mean <math>\pm</math> SD</b> | 2.14 $\pm$ 1.22         | 2.84 $\pm$ 1.48      |                |         |

|                                                                 |             |             |        |          |
|-----------------------------------------------------------------|-------------|-------------|--------|----------|
| ≤1                                                              | 178 (17.89) | 22 (2.21)   |        |          |
| (1,3)                                                           | 420 (42.21) | 99 (9.95)   | 43.679 | <0.001** |
| [3,5)                                                           | 148 (14.87) | 55 (5.53)   |        |          |
| ≥5                                                              | 40 (4.02)   | 33 (3.32)   |        |          |
| <b>Total time spent on wearing PPE (hours/ week), mean ± SD</b> | 30.45±14.25 | 34.02±14.25 |        |          |
| ≤20                                                             | 235 (23.62) | 41 (4.12)   |        |          |
| (20,40)                                                         | 216 (21.71) | 51 (5.13)   | 13.403 | 0.004*   |
| [40,60)                                                         | 311 (31.26) | 108 (10.85) |        |          |
| ≥60                                                             | 24 (2.41)   | 9 (0.90)    |        |          |
| <b>History of allergic diseases</b>                             |             |             |        |          |
| Yes                                                             | 160 (16.09) | 86 (8.64)   | 38.351 | <0.001** |
| No                                                              | 626 (62.91) | 123 (12.36) |        |          |
| <b>Hypertension</b>                                             |             |             |        |          |
| Yes                                                             | 83 (8.34)   | 23 (2.31)   | 0.034  | 0.853    |
| No                                                              | 703 (70.65) | 186 (18.69) |        |          |
| <b>Diabetes</b>                                                 |             |             |        |          |
| Yes                                                             | 16 (1.61)   | 6 (0.60)    | 0.533  | 0.466    |
| No                                                              | 770 (77.39) | 203 (20.40) |        |          |
| <b>Cardiovascular diseases (CVDs)</b>                           |             |             |        |          |
| Yes                                                             | 9 (0.9)     | 8 (0.8)     | 7.075  | 0.008*   |
| No                                                              | 777 (78.09) | 201 (20.20) |        |          |
| <b>Autoimmune diseases</b>                                      |             |             |        |          |
| Yes                                                             | 2 (0.20)    | 4 (0.40)    | 7.585  | 0.006*   |
| No                                                              | 784 (78.79) | 205 (20.61) |        |          |
| <b>Negative psycho-social stimuli</b>                           |             |             |        |          |
| Yes                                                             | 409 (41.11) | 126 (12.66) | 4.533  | 0.003*   |
| No                                                              | 377 (37.89) | 83 (8.34)   |        |          |
| <b>Active inflammation**</b>                                    |             |             |        |          |
| Yes                                                             | 112(11.26)  | 35(3.51)    | 0.818  | 0.366    |
| No                                                              | 674(67.74)  | 174(17.49)  |        |          |
| <b>History of atopic dermatitis</b>                             |             |             |        |          |
| Yes                                                             | 10 (1.01)   | 28 (2.81)   | 66.176 | <0.001** |
| No                                                              | 777 (78.01) | 181 (18.17) |        |          |
| <b>Family history of dermatitis</b>                             |             |             |        |          |
| Yes                                                             | 11 (1.11)   | 37 (3.72)   | 95.583 | <0.001** |
| No                                                              | 775 (77.88) | 172 (17.29) |        |          |
| <b>Palmar and plantar hyperhidrosis</b>                         |             |             |        |          |
| Yes                                                             | 94 (9.45)   | 49 (4.92)   | 17.698 | <0.001** |
| No                                                              | 692 (69.55) | 160 (16.08) |        |          |

130 *Note: n, number of patients; %, proportion. \* The total proportion was greater than 100%. \*\*Active inflammation*  
 131 *are defined as individuals may experience concurrent upper respiratory tract infections, as well as gastrointestinal*  
 132 *and urinary tract infections during the initial stages of skin lesions.*

133 Allergic diseases are systemic disorders caused by an impaired immune system. The total number  
134 of patients in the case group was 86, including those with allergic dermatitis (n=31), allergic  
135 rhinitis (n=35) and bronchial asthma (n=20). The total number of patients in the control group was  
136 160, including those with allergic dermatitis (n=10), allergic rhinitis (n=138) and bronchial asthma  
137 (n=12).

138 Cardiovascular diseases (CVDs) are a collective term for heart and vascular diseases, mainly  
139 including coronary heart disease, cerebrovascular diseases (such as stroke), peripheral arterial  
140 diseases, congenital heart disease, deep vein thrombosis, and pulmonary embolism. The total  
141 number of patients in the case group was 8, including those with cerebral infarction (n=4) and  
142 coronary artery disease (n=4). The total number of patients in the control group was 9, including  
143 coronary artery disease (n=9).

144 Autoimmune diseases are defined as an abnormal response of B cells and/or T cells towards  
145 endogenous antigens, which in turn leads to self-directed immunity and eventually presents as  
146 either localized tissue damage or as a systemic disease. The total number of patients in the case  
147 group was 4, which included patients with Sjögrens syndrome (n=1), Hashimoto's thyroiditis  
148 (n=1), IgA nephropathy (n=1) and psoriatic arthritis (n=1). There were 2 patients in the control  
149 group is, one with IgA nephropathy (n=1) and one with Hashimoto's thyroiditis (n=1).

150 Negative Psychosocial Stimuli: The total number of patients in the case group was 126, including  
151 those with stress (n=26), insomnia (n=33), depression (n=29) and anxiety (n=38). There were 409  
152 individuals in the control group, including those with stress (n=89), insomnia (n=73), depression  
153 (n=98) and anxiety (n=149). Family history of dermatitis: The total number of patients in the case  
154 group was 37, including those with atopic dermatitis (n=31), psoriasis (n=4), exfoliative keratosis  
155 (n=1) and seborrheic dermatitis (n=1). There were 11 individuals in the control group, including  
156 those with atopic dermatitis (n=10) and seborrheic dermatitis (n=1).

157 There were no significant differences in exposure to disinfectants and the prevalence of  
158 hypertension, diabetes or active inflammation between the two groups. However, we noted  
159 significant differences between the two groups in the total time spent on skin cleansing and skin  
160 antiseptic procedures ( $\chi^2=43.679$ ,  $P<0.001$ ) and the total time spent on wearing PPE ( $\chi^2=13.403$ ,  
161  $P=0.004$ ). Furthermore, the prevalence of these skin lesions among participants with allergic  
162 diseases was significantly greater than that among participants without allergic diseases  
163 ( $\chi^2=38.351$ ,  $P<0.001$ ). The prevalence of these skin lesions among participants with  
164 cardiovascular diseases, autoimmune diseases, a history of atopic dermatitis, a family history of  
165 dermatitis and palmar & plantar hyperhidrosis was also greater than that among participants  
166 without diseases (All  $P<0.05$ ). In addition, those who experienced negative psychosocial stimuli  
167 or a family history of dermatitis were more likely to have greater incidence of these skin lesions.  
168 ( $\chi^2=4.533$ ,  $P=0.003$  and  $\chi^2=95.583$ ,  $P<0.001$ , respectively).

169 Of the 209 participants with comorbidities, 13 (31.0%) exhibited DRPIs, 165 (78.95%) had  
170 MASD, and twenty (9.57%) experienced both DRPIs and MASD. Additionally, one patient  
171 (0.48%) experienced both DRPIs and STs and another patient (0.48%) had both MASD and STs.  
172 Furthermore, nine participants (4.30%) presented with all three types of skin lesions.

### 173 **3.2 Type-specific distribution patterns**

174 There were 363 skin lesions in total, among which forty-three were DRPIs, and the head-face and  
175 neck areas were two of the most prevalent locations. Three hundred and seven out of 363 patients  
176 had MASD, the hand, neck and forearm and wrist area were the most vulnerable areas, in order of



177 highest prevalence. Thirteen of 363 patients had STs, and the head-face area was the most  
 178 common location (Table 3).  
 179 Table 3. Type-specific distribution patterns of skin lesions caused by medical disinfectants and  
 180 personal protective equipment (n=363)

| Type of skin lesions | Count (n, %)    | Scalp (n, %)    | Head& face (n, %) | Neck (n, %)     | Axillae (n, %) | Groin (n, %)   | Forearm & wrist (n, %) | Dorsum of Hand (n, %) | Palm (n, %)      | Ankle (n, %)   | Foot (n, %)    |
|----------------------|-----------------|-----------------|-------------------|-----------------|----------------|----------------|------------------------|-----------------------|------------------|----------------|----------------|
| DRPIs                | 43(100)         | 0(0)            | 36 (83.72)        | 7(16.28)        | 0(0)           | 0(0)           | 0(0)                   | 0(0)                  | 0(0)             | 0(0)           | 0(0)           |
| MASD                 | 307(100)        | 14(4.56)        | 17(5.54)          | 26 (8.47)       | 3(0.98)        | 5(1.63)        | 25(8.14)               | 136 (44.30)           | 69(22.48)        | 7(2.27)        | 5(1.63)        |
| STs                  | 13(100)         | 0(0)            | 10 (76.93)        | 1(7.69)         | 0(0)           | 1(7.69)        | 0(0)                   | 0(0)                  | 0(0)             | 1(7.69)        | 0(0)           |
| <b>Total</b>         | <b>363(100)</b> | <b>14(3.86)</b> | <b>63 (17.36)</b> | <b>34(9.37)</b> | <b>3(0.83)</b> | <b>6(1.65)</b> | <b>25(6.88)</b>        | <b>136 (37.47)</b>    | <b>69(19.00)</b> | <b>8(2.20)</b> | <b>5(1.38)</b> |

181 **3.3 Distribution of onset time**

182 This temporal analysis reveals two peaks between January 2022 and March 2023. The first peak  
 183 occurred in June 2022, followed by a second larger peak from December 2022 through January  
 184 2023, which demonstrated that the early summer of 2022 and winter and early spring of 2023  
 185 were high-incidence seasons. This result is consistent with the fact that the lockdown was initiated  
 186 in Shanghai in March 2022 and gradual reopening started in December 2022 (Figure 1).

187 Figure 1. Temporal Distribution of the Onset of Skin Lesions Caused by Medical Disinfectants  
 188 and Personal Protective Equipment (Histogram) (n=209)

189 **3.2. Related factors**

190 The potential independent variables included in logistic regression analysis are shown in Table 4.  
 191 The variables “occupation”, “workforce”, “total time spent on wearing PPE”, “history of atopic  
 192 dermatitis” and “negative psychosocial stimuli” were examined in the multivariate model, which  
 193 revealed no statistically significant associations with the onset of skin lesions. Thus, the risk  
 194 factors for the skin lesions examined included the total time spent on skin cleansing and antiseptic  
 195 procedures, cardiovascular diseases, autoimmune diseases, allergic diseases, family history of skin  
 196 dermatitis and palmar and plantar hyperhidrosis.

197 The odds ratio(ORs) calculated were as follows: Cardiovascular diseases (OR=5.173; 95%  
 198 CI=1.610 to 16.624; P=0.006), autoimmune diseases (OR=11.405; 95% CI=1.383 to 94.034;  
 199 P=0.024), allergic diseases (OR=1.755; 95% CI=1.205 to 2.556; P=0.003), family history of skin  
 200 dermatitis (OR=35.255; 95% CI=3.850 to 322.845; P=0.002) and palmar and plantar  
 201 hyperhidrosis (OR=1.816; 95% CI=1.169 to 2.823; P=0.008). Factors associated with greater  
 202 likelihood of suffering from skin lesions were the total time spent on skin cleansing and antiseptic  
 203 procedures (P<0.001). Multivariable Logistic Regression demonstrated a statistically significant  
 204 differences in total duration as follows: ≥5 hours and ≤1 hour (OR=0.156; 95% CI=0.076 to 0.320;  
 205 P<0.001), 1-3 hours (OR=0.333; 95% CI=0.188 to 0.591; P<0.001), and 3-5 hours (OR=0.476;  
 206 95% CI=0.256 to 0.883; P=0.019), suggesting an increased risk of disease incidence with  
 207 exposure.

208

209 Table 4. Factors associated with skin lesions caused by medical disinfectants and personal  
210 protective equipment according to multivariate logistic regression

| Variables                                                                                 | <i>Multivariate</i> |           |           |                 |                |
|-------------------------------------------------------------------------------------------|---------------------|-----------|-----------|-----------------|----------------|
|                                                                                           | <i>B</i>            | <i>SE</i> | <i>OR</i> | <i>95% CI</i>   | <i>P value</i> |
| <b>Occupation</b>                                                                         |                     |           |           |                 | 0.656          |
| <b>Workforce</b>                                                                          |                     |           |           |                 | 0.366          |
| <b>Total time spent on skin<br/>cleansing and antiseptic<br/>procedures (hours/ week)</b> |                     |           |           |                 | <0.0001**      |
| ≤1                                                                                        | -1.861              | 0.367     | 0.156     | (0.076,0.320)   | <0.0001**      |
| (1,3)                                                                                     | -1.099              | 0.292     | 0.333     | (0.188,0.591)   | <0.0001**      |
| [3,5)                                                                                     | -0.743              | 0.315     | 0.476     | (0.256,0.883)   | 0.019          |
| ≥5                                                                                        | 0.000               |           |           |                 |                |
| <b>Total time spent on wearing<br/>PPE (hours/ week)</b>                                  |                     |           |           |                 | 0.471          |
| <b>History of atopic<br/>dermatitis</b>                                                   | 1.302               | 1.192     | 3.677     | (0.355, 38.051) | 0.275          |
| <b>CVDs</b>                                                                               | 1.643               | 0.596     | 5.173     | (1.610,16.624)  | 0.006*         |
| <b>Autoimmune diseases</b>                                                                | 2.434               | 1.076     | 11.405    | (1.383,94.034)  | 0.024*         |
| <b>Allergic diseases</b>                                                                  | 0.563               | 0.192     | 1.755     | (1.205,2.556)   | 0.003*         |
| <b>Family history of skin<br/>dermatitis</b>                                              | 3.563               | 1.130     | 35.255    | (3.850,322.845) | 0.002*         |
| <b>Negative psychosocial<br/>stimuli</b>                                                  | 0.185               | 0.183     | 1.204     | (1.169, 2.823)  | 0.311          |
| <b>Palmar and plantar<br/>hyperhidrosis</b>                                               | 0.597               | 0.225     | 1.816     | (1.169,2.823)   | 0.008*         |

211 Note: \* $P < 0.05$ , \*\* $P < 0.001$ . SE, standard error. OR, odds ratio. 95% CI, 95% confidence  
212 interval.

## 213 4. Discussion

### 214 4.1 Characteristics and prevalence

215 Overall, surveys from 995 patients were examined and a chi-square test was used to compare  
216 demographic data between the two groups. The results revealed statistically significant differences  
217 in occupation and workforce, but no significant differences were observed in sex, age or  
218 protection level ( $P > 0.05$ ). These findings are in contrast with existing literature published between  
219 2019 and 2020 [2-5], which primarily examined healthcare personnel between the ages of 20 to 40  
220 years working in SARS-CoV-2-designated hospitals in China. These studies revealed  
221 unexpectedly high females to males ratios, along with a significant proportion of individuals using  
222 level 3 barrier PPE for protection and an imbalanced age distribution [2-5]. However, during  
223 SARS-CoV-2 pandemic lockdown period, various stakeholders, including healthcare professionals,  
224 temporary sampling site workers, community members and volunteers, made substantial efforts to  
225 combat the SARS-CoV-2 virus. The disaggregation of data on sex and age became more detailed,  
226 and the distribution of protection levels became more equitable.



227 The prevalence of DRPIs and the proportion of participants exhibiting two or three types of skin  
228 lesions observed in the current study was less when compared to previous domestic literature  
229 covering the period from 2019 to 2020 [2-5], but align with earlier studies [1,6-8]. Several potential  
230 hypotheses can be proposed to explain these results. First, it is plausible that the total duration of  
231 skin cleansing and PPE use among temporary sampling site workers, community members and  
232 volunteers was shorter than that among medical staff. This practice effectively mitigated the risk  
233 of developing DRPIs or the cooccurrence of other types of skin lesions, preventing simple skin  
234 lesions from becoming more severe. Second, the findings of this study exhibited a greater degree  
235 of generalizability when applied to a larger population. Third, variations in temperature, humidity  
236 and other climatic factors could account for the observed differences between these variables.

237 A total of 363 skin lesions were observed, forty-three of which were identified as DRPIs,  
238 primarily affecting the head-face and neck regions. The majority of the lesions (307 out of 363)  
239 were classified as MASD, with a higher prevalence observed in the hand and neck areas.  
240 Additionally, thirteen lesions were categorized as STs, predominantly occurring in the head-face  
241 region. These findings align with previous research studies [1-7]. Notably, the occurrence of DRPIs  
242 lesions were primarily attributed to friction and shear stress resulting from the use of nasal and  
243 facial masks or protective eyewear. Failure to address these stress-related issues may cause skin  
244 tearing. Hence, while STs are commonly associated with DRPIs, the two do not occur  
245 concurrently.

246 MASD occurs in regions characterized by excessive sweating and elevated levels of skin humidity,  
247 such as palms, soles, and axillae [6-7]. Notably, this study revealed a greater incidence in the palms  
248 and head and face area compared to previous studies [6]. This observation aligns with observations  
249 made in clinical practice. Since protective measures primarily include nasal and facial protection,  
250 as well as hand cleansing and disinfection, the vulnerability of the palms and head and face area is  
251 accentuated.

#### 252 **4.2 Analysis of related factors**

253 Risk factors and skin lesions caused by medical disinfectants and PPE were identified through  
254 multivariable logistic regression. Autoimmune disease, a family history of skin dermatitis, CVDs,  
255 palmar and plantar hyperhidrosis, and allergic diseases were found to be independent risk factors  
256 for these skin lesions. Variables mentioned above may be linked to genetic diversity and the  
257 immune microenvironment in vivo. However, these hypotheses need further confirmation.  
258 Therefore, in future research, we intend to increase the sample size and evaluate the levels of  
259 immune-inflammatory cells and immune-inflammatory factors, including tumor necrosis factor  
260 (TNF) and interleukin (IL).

261 The statistical analysis revealed that workforce, protection level, total time spent on wearing PPE,  
262 or psychosocial factors were not significantly associated with the onset of skin lesions ( $P>0.05$ ).

263 Factors such as total duration of wearing PPE, history of atopic dermatitis and negative  
264 psychosocial stimuli might offer some protection, but further analysis revealed no significant  
265 difference between groups. Nevertheless, this speculation requires confirmation by additional  
266 studies with larger sample sizes.

267 However, the total time spent on skin cleansing and antiseptis procedures were identified as risk  
268 factors for these skin lesions. The findings of this study demonstrated a positive association  
269 between the duration of exposure and the ORs calculated, suggesting an increased risk of disease  
270 incidence. These estimates align with the observed patterns in real-world scenarios.

271 Occupation was not significantly associated with the onset of skin lesions. This finding differed  
272 from previous literature from 2019-2020 that studied healthcare workers in China<sup>[2-5]</sup>. It is  
273 speculated that the limited working hours of volunteers, community members or temporary  
274 sampling site workers might reduce the duration of exposure to medical disinfectants and PPE  
275 compared to that of medical staff, while doctors, nurses, pharmacists and administrators, might  
276 demonstrate a greater level of awareness regarding skin protection and are more likely to employ  
277 effective measures to prevent skin lesions. Therefore, occupation emerged as a confounding  
278 variable in relation to other factors within the framework of national epidemic prevention and  
279 control.

## 280 **5. Conclusions**

281 During the SARS-CoV-2 pandemic lockdown period, skin lesions among epidemic prevention  
282 workers was prevalent, which was primarily attributed to the use of medical disinfectants and PPE.  
283 These skin lesions frequently manifested as a combination of various subtypes across different  
284 areas of the body. The prevalence and characterization of these skin lesions varied over time.

285 Throughout the third year of the pandemic, SARS-CoV-2 and other pathogens circulated at  
286 relatively low levels. These skin lesions have the potential to persist long term and significantly  
287 impact quality of life. Drawing upon evidence from the literature, it is recommended that  
288 individuals who engage in skin cleansing and skin antiseptic protocols for extended periods,  
289 particularly after working in level three barrier protection for more than five hours, should take  
290 mandatory breaks or shifts.

291 Several individual factors, along with the total time spent on skin cleansing and antiseptic  
292 procedures, were identified as significant risk factors for the development of skin lesions. We  
293 suggest the use of a comprehensive screening scale to identify individuals at high risk for skin  
294 lesions, with the aim of implementing targeted interventions to prevent their occurrence. These  
295 interventions involve the early application of dressings, topical agents, and antiallergic  
296 medications to mitigate skin friction and moisture. Additionally, it is imperative to mobilize  
297 collective action in the field of public health to promote education on skin barrier protection as an  
298 essential preventive measure.

299 **Acknowledgment:** Informed consent was obtained from all subjects involved in the study. This  
300 study was reviewed and approved by the Research Ethics Committee of Wusong Hospital,  
301 Zhongshan Hospital, Fudan University (IRB No.2022-SYY-15).

302 **Author contributions:** Jing-Yi Hu, Xiu-Li Xiao: conceptualization, methodology, validation,  
303 investigation, data curation, writing-review and editing of the manuscript draft. Jing-Yi Hu:  
304 formal analysis, writing-original draft. Xiu-Li Xiao, Yi Lu, Jian-Yong Su: project administration.  
305 Jing-Yi Hu, Xiu-Li Xiao: funding acquisition. Xiu-Li Xiao: supervision. Yan Zhang, Ting Shang,  
306 Chun-Hua Zhang, Lian Guo and Jian-chao Wang: writing, reviewing and editing the draft. All  
307 authors have read and approved the final manuscript.

308 **Disclosure statement:** No potential conflicts of interest were reported by the author(s).

309 **Funding:** This research was supported by the Science and Technology Commission Project (STC)  
310 of Shanghai Baoshan district (2023-E-54) and the Fifth Batch of National Excellent Clinical  
311 Talents Training Program for Traditional Chinese Medicine [National Traditional Chinese  
312 Medicine Education Letter (2022) No.1].

313 **Data availability statement:** The data that support the findings of this study are available from  
314 the corresponding author upon reasonable request.

315 **Abbreviations:**

- 316 1. SARS-CoV-2: Severe Acute Respiratory Syndrome Coronavirus 2  
317 2. CVDs: Cardiovascular diseases  
318 3. DRPIs: Device-related pressure injuries  
319 4. MASD: moisture-associated skin damage  
320 5. STs: skin tears  
321 6. TNF: tumor necrosis factor  
322 7. IL: interleukin  
323 8. B: coefficient of regression  $\beta$  (beta)  
324 9. SE: standard error  
325 10. OR: odds ratio  
326 11. 95% CI: 95% confidence interval.  
327 12. PPE: personal protective equipment

328 **References:**

- 329 [1] BARAKAT-JOHNSON M, BARNETT C, WAND T, et al. Medical device-related pressure  
330 injuries : an exploratory descriptive study in an acute tertiary hospital in Australia . J Tissue  
331 Viability. 2017; 26(4):246-253. DOI: 10.1016/j.jtv.2017.09.008.  
332 [2] Xia J, Duan X, Cao XC, et al. Observation on the prevention effect of pressure injury on the  
333 nose and face of nurses responsible for preventing and controlling the novel coronavirus  
334 pneumonia. Journal of Nursing Administration. 2020; 20(4) : 276-279 . DOI: 10.3969 / j.issn.  
335 1671-315X. 2020. 04. 012  
336 [3] DAI YJ, GAO R, LAO DB, et al. Investigation on Medical Staff's Skin Injuries during the  
337 Outbreak of Novel Coronavirus Pneumonia and Its Influencing Factors. Nurs J Chin PLA.  
338 2020;37(4) : 46-50. DOI: 10.3969/j. issn.1008-9993.2020.04.0011  
339 [4] JIANG QX, LIU YX, WEI W, et al. The Incidence and epidemic characteristics of medical  
340 staff's skin injuries caused by personal protective equipment for fighting against SARS-CoV-2  
341 infection . Chinese General Practice. 2020;23(9): 1083-1090 . DOI :  
342 10.12114/j.issn.1007-9572.2020.00.315.  
343 [5] Zheng J, Cai CC, Li C, et al. Analysis of related factors of head and face pressure injury caused  
344 by protective equipment in medical staffs of epidemic prevention hospitals in Huangshi. Pract  
345 Geriatr. 2020;34(7): 750-752. doi: 10. 3969 /j. Issn. 1003-9198.2020.07.032  
346 [6] WOO KY, BEECKMAN D, CHAKRAVARTHY D. Management of moisture-associated skin  
347 damage : a scoping review[J] . Adv Skin Wound Care. 2017;30(11): 494-501 . DOI :  
348 10.1097/01.ASW. 0000525627. 54569. da.  
349 [7] European Pressure Ulcer Advisory Panel. National Pressure Injury Advisory Panel and Pan  
350 Pacific Pressure Injury Alliance. Prevention and treatment of pressure ulcers/injuries: clinical  
351 practice guideline. The international guideline[EB/OL]. [2023-06-29]. [http://www. Internationa  
352 lguideline. com /guideline.](http://www.Internationalguideline.com/guideline)  
353 [8] ZULKOWSKI K. Understanding moisture-associated skin damage, medical adhesive-related  
354 skin injuries , and skin tears . Adv Skin Wound Care. 2017;30(8): 372-381 . DOI :  
355 10.1097/01.ASW.0000521048.64537.6e.  
356 [9] JIANG QX, JIANG ZX, ZHENG MC, et al. Multicenter crosssectional survey on prevalence  
357 and epidemiologic features of skin tears in hospitals. Chinese Nursing Management. 2017; 17(5):  
358 631-636. DOI: 10.3969/j.issn.1672-1756.2017.05.014.

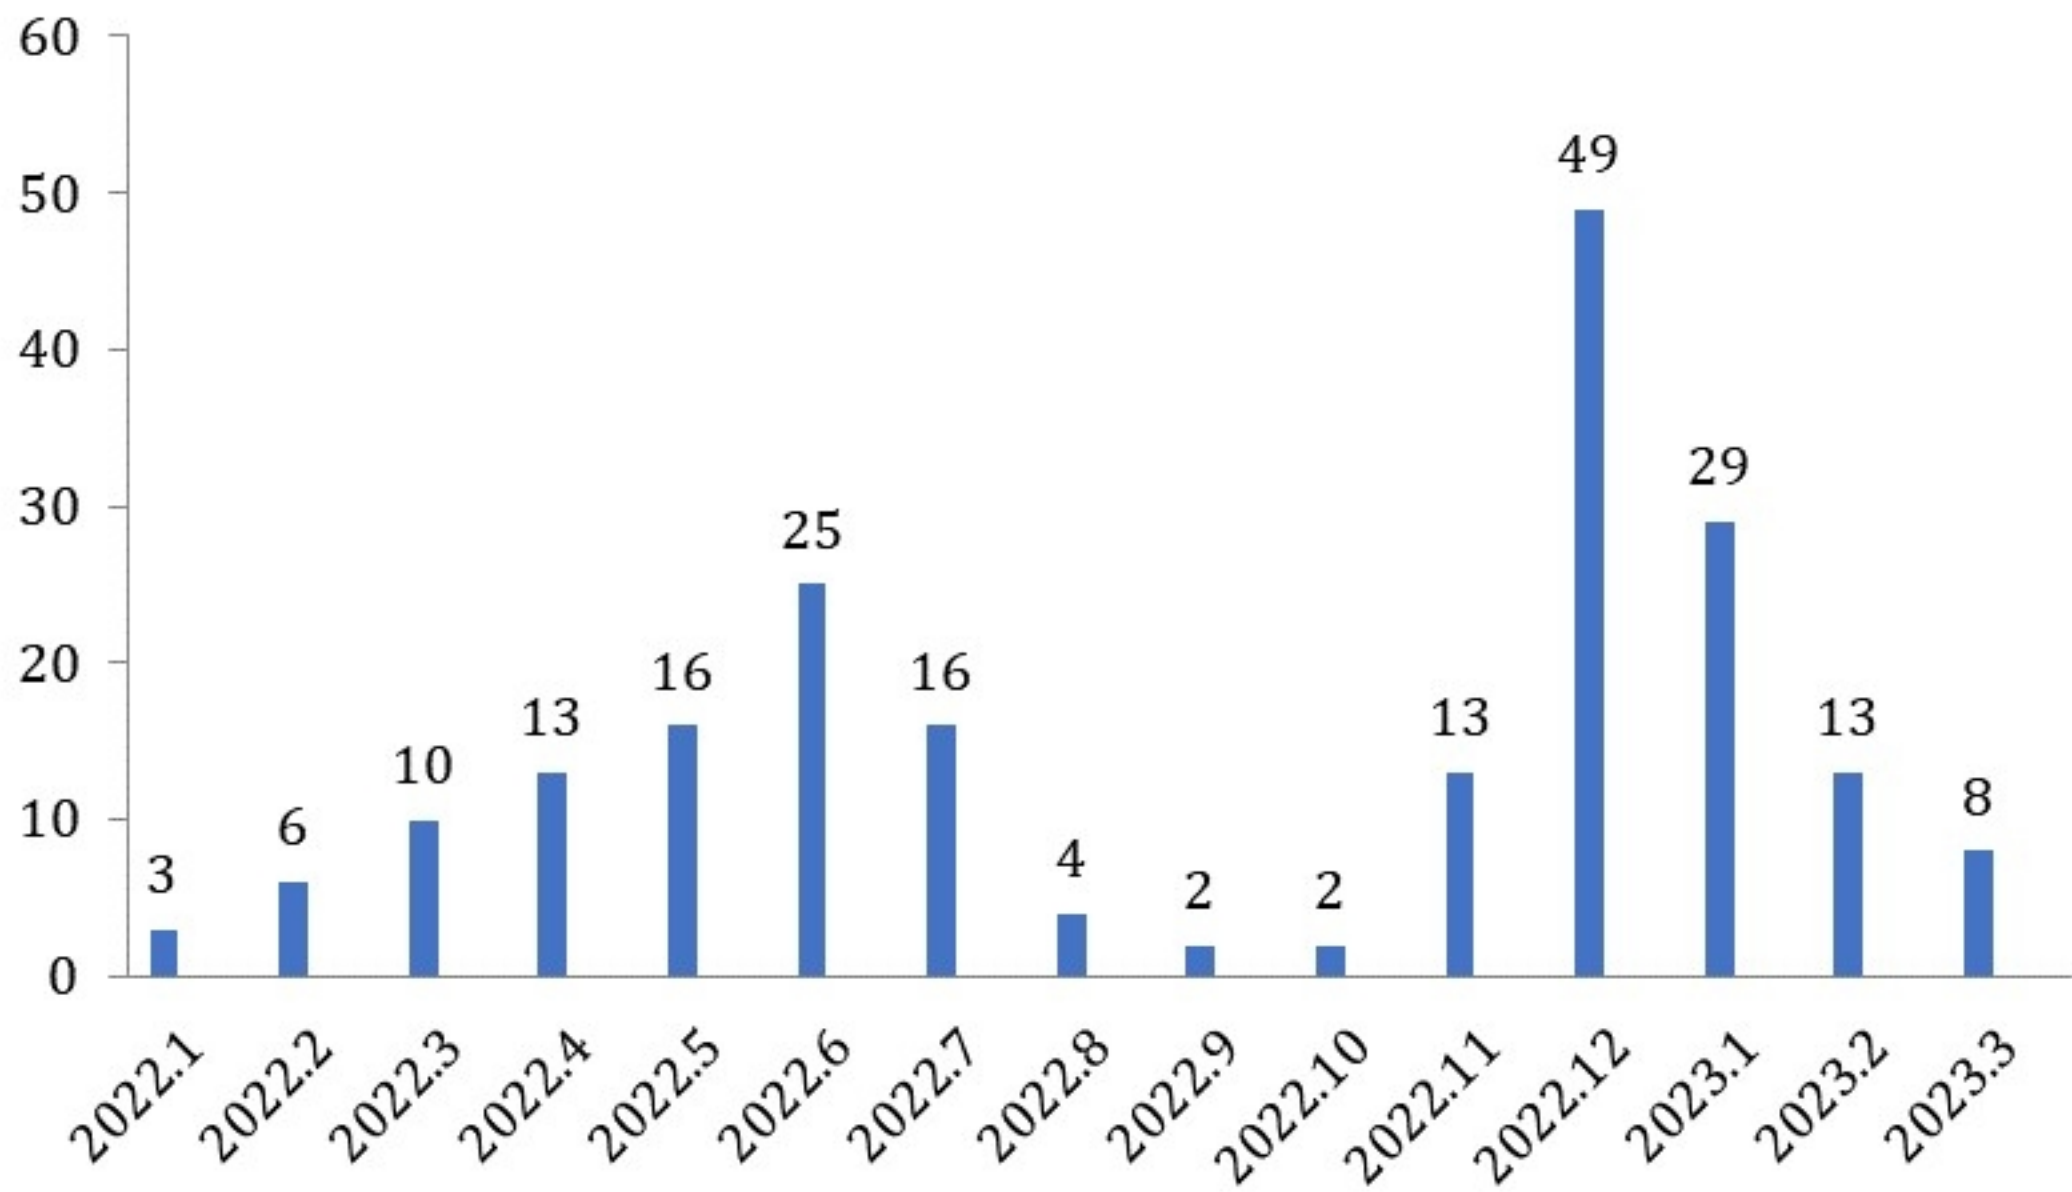

Figure
